# Supplementary material for: Archaea Signal Recognition Particle Shows the Way
Source: Hindawi journal article supplement (doi:10.1155/2010/485051), 2010-01-01
Supplement: f1 [file 485051.f1.pdf]

## Supplementary Material 1

| SRP protein | Features                                     | Positions |
|-------------|----------------------------------------------|-----------|
| SRP19       | Y/W                                          | 29        |
|             | GR                                           | 42-43     |
|             | Loop 1                                       | 29-55     |
|             | Loop 2                                       | 67-69     |
|             | <i>Thermococcales</i> insert L3              | 82-86     |
| SRP54       | I-box                                        | 148-147   |
|             | <i>Sulfolobales</i> insert GY                | 208-210   |
|             | RXLGXGD                                      | 308-314   |
|             | <i>Thermococcales</i> insert LEKEV           | 325-329   |
|             | <i>Halobacteriales</i> insert GLMD           | 381-384   |
|             | Fingerloop                                   | 375-395   |
|             | <i>Methanococcales</i> insert GG             | 466-467   |
| FtsY        | DV                                           | 318-319   |
|             | P                                            | 355       |
|             | GKTT                                         | 397-401   |
|             | I-box                                        | 423-432   |
|             | GR                                           | 477-478   |
|             | GG                                           | 540-541   |
|             | <i>Nitrosopumilus maritimus</i> repeats EPTP | 592-642   |
|             | Uncultured marine crenarchaeota repeats EPVP | 645-684   |

Table. Features extracted from the alignment of archaea SRP proteins. The same features are shown in Figure 3. The column positions in the respective alignments of SRP19, SRP54 and FtsY are given in the right column.
