# Supplementary material for: Archaea Signal Recognition Particle Shows the Way
Source: Hindawi journal article supplement (doi:10.1155/2010/485051), 2010-01-01
Supplement: f2 [file 485051.f2.pdf]

## Supplementary Material 2. SRP database links

SRP database (SRPDB):

<http://rnp.uthct.edu/rnp/SRPDB/SRPDB.html>

Archaea SRP RNA lists and alignment file:

[http://rnp.uthct.edu/rnp/SRPDB/rna/srprnaphylolist\\_arch.html](http://rnp.uthct.edu/rnp/SRPDB/rna/srprnaphylolist_arch.html)

[http://rnp.uthct.edu/rnp/SRPDB/rna/srprnaalphalist\\_arch.html](http://rnp.uthct.edu/rnp/SRPDB/rna/srprnaalphalist_arch.html)

<http://rnp.uthct.edu/rnp/SRPDB/rna/alignment/fasta/SRPRNA-archaea.fasta>

Archaea protein SRP19 lists and alignment file:

<http://rnp.uthct.edu/rnp/SRPDB/protein/srp19/srp19phylolist-arch.html>

<http://rnp.uthct.edu/rnp/SRPDB/protein/srp19/srp19alphalist-arch.html>

[http://rnp.uthct.edu/rnp/SRPDB/protein/srp19/alignment/fasta/srp19-arch\\_ali.fasta](http://rnp.uthct.edu/rnp/SRPDB/protein/srp19/alignment/fasta/srp19-arch_ali.fasta)

Archaea protein SRP54 lists and alignment file:

<http://rnp.uthct.edu/rnp/SRPDB/protein/srp54/srp54phylolist-arch.html>

<http://rnp.uthct.edu/rnp/SRPDB/protein/srp54/srp54alphalist-arch.html>

<http://rnp.uthct.edu/rnp/SRPDB/protein/srp54/alignment/fasta/SRP54-archaea.fasta>

Archaea protein FtsY (SR-alpha) lists and alignment file:

<http://rnp.uthct.edu/rnp/SRPDB/protein/sralpha/ftsylolist-arch.html>

<http://rnp.uthct.edu/rnp/SRPDB/protein/sralpha/ftsyalphalist-arch.html>

<http://rnp.uthct.edu/rnp/SRPDB/protein/sralpha/alignment/fasta/SRPFtsY-archaea.fasta>
